# Supplementary material
Source: PubMed Central journal article supplement (PMC2662939)

INFLUENCE OF LEUKOTRIENE PATHWAY POLYMORPHISMS ON  
RESPONSE TO MONTELUKAST IN ASTHMA

John J Lima, Shu Zhang, Audrey Grant, Lianhe Shao,  
Kelan G Tantisira, Hooman Allayee, Jianwei Wang, James Sylvester,  
Janet Holbrook, Robert Wise, Scott T Weiss, Kathleen Barnes

**ON-LINE DATA SUPPLEMENT**

## ON-LINE FIGURE LEGEND

Figure E1. Linkage disequilibrium (LD) between *ALOX5* SNPs in Whites with asthma who received montelukast for 6 months. The numbers in the blocks refer to the values of  $D' \times 100$ , which estimates the degree of LD. Values of 0 indicate no LD, values of  $D' \times 100$  indicate complete LD, and are shown as dark red with no number.

Figure E2. Linkage disequilibrium (LD) between *MRP1* SNPs in Whites with asthma who received montelukast for 6 months. The numbers in the blocks refer to the values of  $D' \times 100$ , which estimates the degree of LD. Values of 0 indicate no LD, values of  $D' \times 100$  indicate complete LD, and are shown as dark red with no number.

FIGURE E1

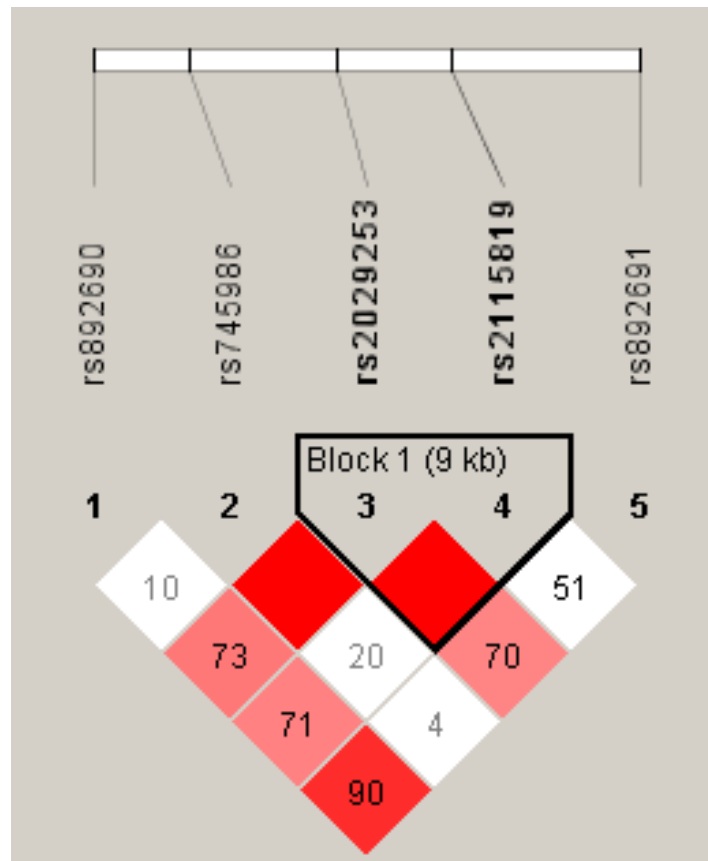

FIGURE E2

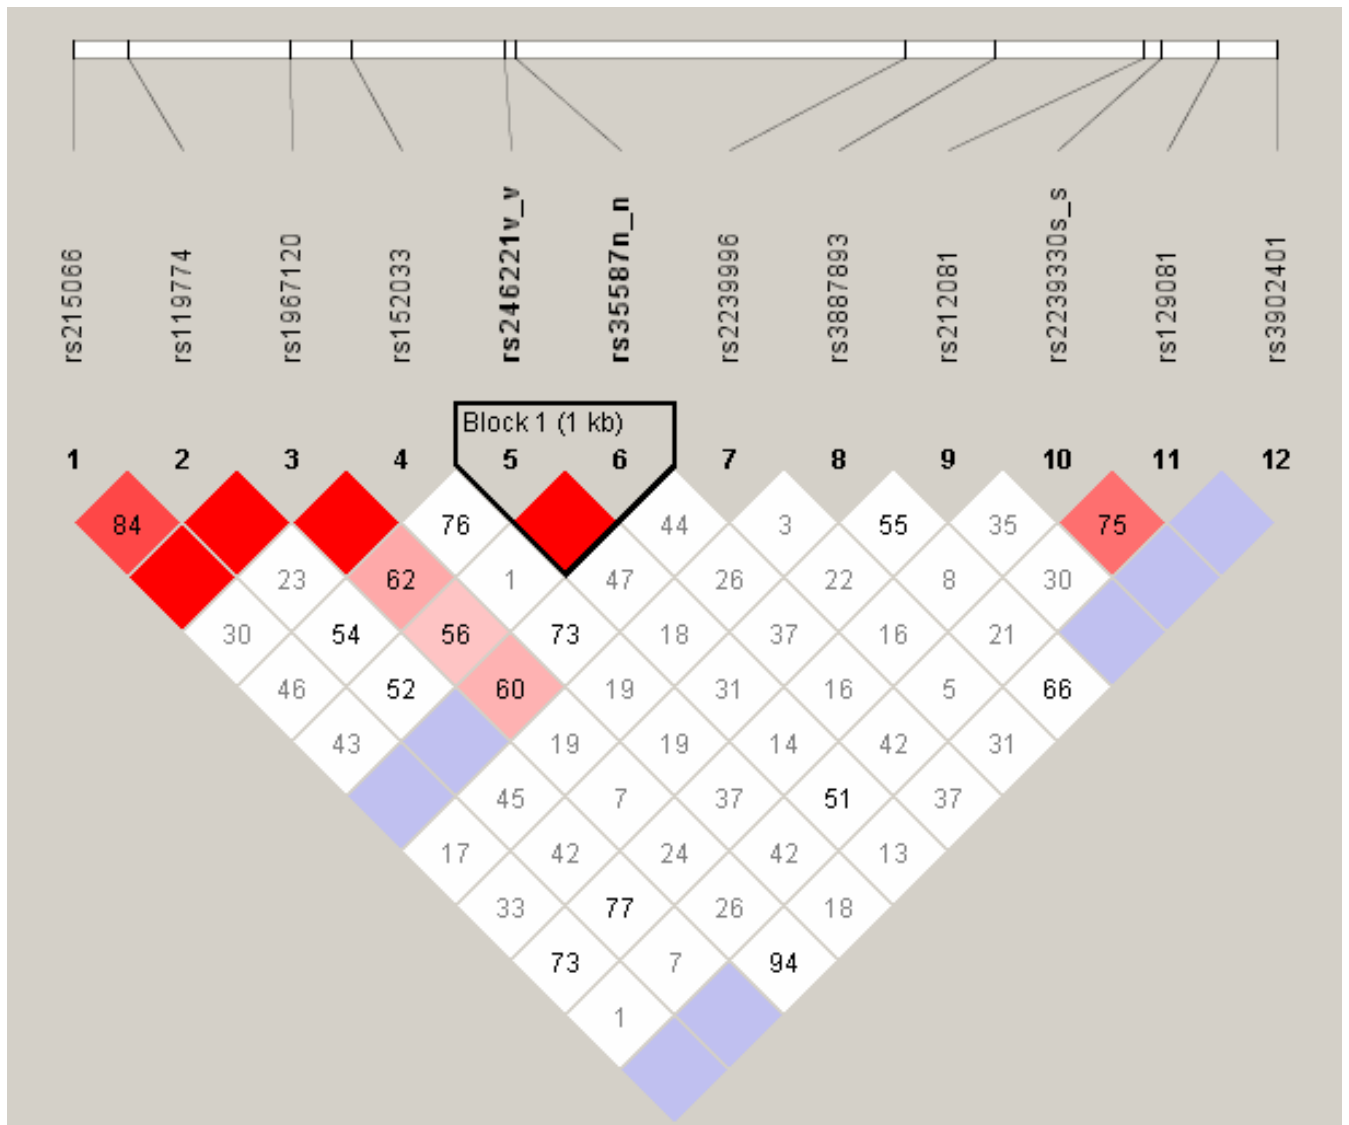

Supplement: supp_173_4_379__1.pdf [file supp_173_4_379__1.pdf]
